# Supplementary material for: Highly efficient catalysts for oxygen reduction using well-dispersed iron carbide nanoparticles embedded in multichannel hollow nanofibers
Source: Royal Society of Chemistry journal article supplement (doi:10.1039/d0ta06306a), 2020-01-01
Supplement: d0ta06306a1.pdf [file d0ta06306a1.pdf]

**Highly Efficient Catalysis for Oxygen Reduction using Well-dispersed Iron Carbide Nanoparticles Embedded in the Multichannel Hollow Nanofibers**

Hongyin Xia<sup>ab</sup>, Shan Zhang<sup>a</sup>, Xiaoqing Zhu<sup>a</sup>, Huanhuan Xing<sup>a</sup>, Yuan Xue<sup>ab</sup>, Bolong Huang<sup>c\*</sup>, Mingzi Sun<sup>c</sup>, Jing Li<sup>a\*</sup>, and Erkang Wang<sup>a\*</sup>

---

<sup>a</sup> State Key Laboratory of Electroanalytical Chemistry, Changchun Institute of Applied Chemistry, Chinese Academy of Sciences, 5625 Renmin Street, Changchun, Jilin 130022, China.

<sup>b</sup> University of Science and Technology of China, Hefei, Anhui, 230026, China.

<sup>c</sup> Department of Applied Biology and Chemical Technology, The Hong Kong Polytechnic University, Hung Hom, Kowloon, Hong Kong SAR, China.

### Equations in Electrochemical characterization

The  $H_2O_2$  yield and the number of electron transfer ( $n$ ) were calculated with the following equations:

$$H_2O_2\% = \frac{200 \times I_r/N}{I_d + I_r/N} \quad (1)$$

$$n = \frac{4I_d}{I_d + I_r/N} \quad (2)$$

where  $I_d$  is the disk current,  $I_r$  is the ring current, and  $N$  (0.37) is the collection efficiency of the rotating ring-disk electrode (RRDE).

Koutecky-Levich equations:

$$\frac{1}{J} = \frac{1}{J_l} + \frac{1}{J_k} = \frac{1}{B\omega^{0.5}} + \frac{1}{J_k} \quad (3)$$

$$B = 0.62nFC_0(D_0)^{2/3}V^{-1/6}$$

where  $J$  is the recorded current density,  $J_k$  is the kinetic-limiting current density,  $J_l$  is the diffusion-limiting current density,  $\omega$  is the electrode rotating speed in  $\text{rad s}^{-1}$ ,  $F$  is the Faraday constant ( $96485 \text{ C mol}^{-1}$ ),  $C_0$  is the bulk concentration of  $O_2$  in 0.10 M KOH solution ( $1.2 \times 10^{-6} \text{ mol cm}^{-3}$ ),  $D_0$  is the diffusion coefficient of  $O_2$  ( $1.9 \times 10^{-5} \text{ cm}^2 \text{ s}^{-1}$ ), and  $V$  is the kinematic viscosity of 0.10 M KOH solution ( $0.01 \text{ cm}^2 \text{ s}^{-1}$ ). The K-L plots ( $\omega^{-1/2}$  vs  $J^{-1}$ ) in  $O_2$ -saturated 0.1 M KOH can be derived from LSV curves at various rotation speeds and different potentials.

### Calibrate to reversible hydrogen electrode (RHE)

In all measurements, we used Hg/HgO electrode as the reference electrode. It was calibrated with respect to RHE. The calibration was performed in the high purity H<sub>2</sub> saturated electrolyte with a Pt wire as the working electrode. CVs were run at a scan rate of 1 mV·s<sup>-1</sup>, and the average of the two potentials at which the current crossed zero was taken to be the thermodynamic potential for the hydrogen electrode reactions. In 0.1 M KOH,  $E(\text{RHE}) = E(\text{Hg/HgO}) + 0.879 \text{ V}$ . All the potentials reported in this manuscript were against RHE.

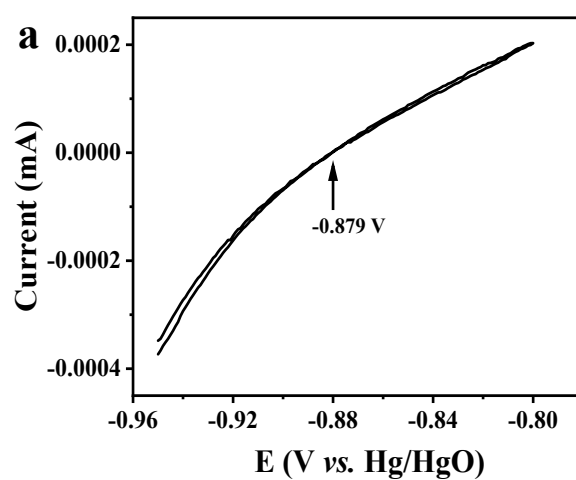

**Figure S1.** (a) Calibration of the reference electrode against the RHE.

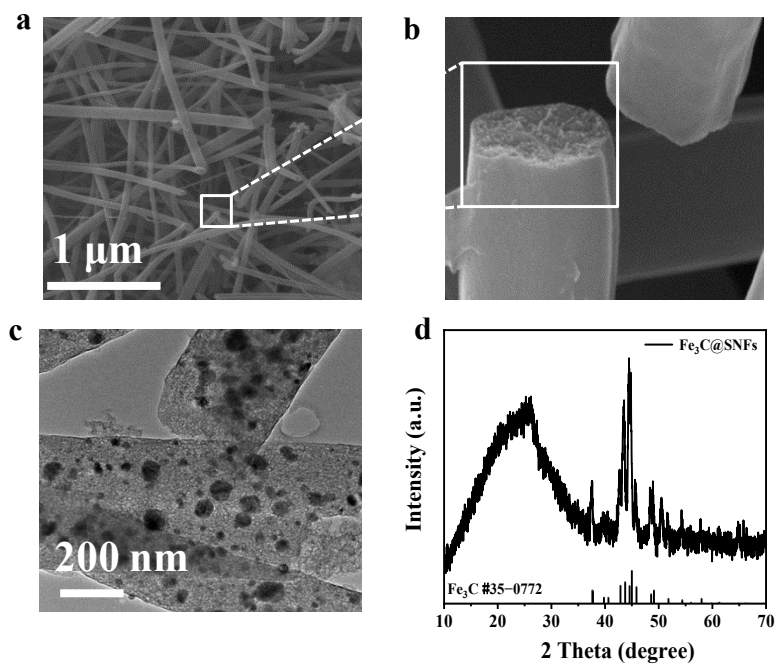

**Figure S2.** (a and b) SEM, (c) TEM images (d) XRD of Fe<sub>3</sub>C@SNFs.

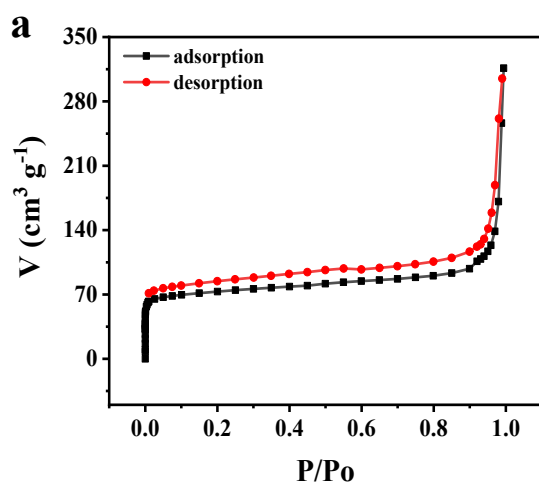

**Figure S3.** (a) Nitrogen adsorption-desorption isotherms for the Fe<sub>3</sub>C@SNFs.

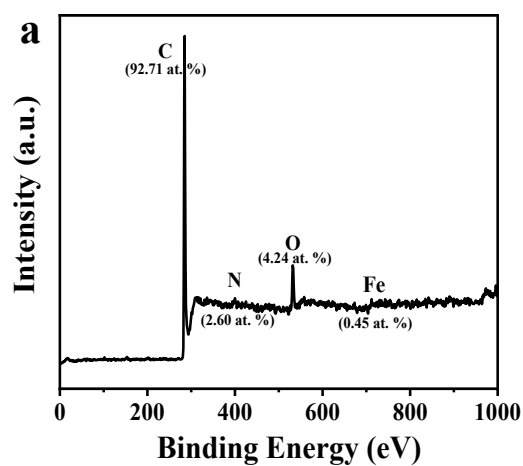

**Figure S4.** (a) XPS survey for the  $\text{Fe}_3\text{C@MHNFs}$ .

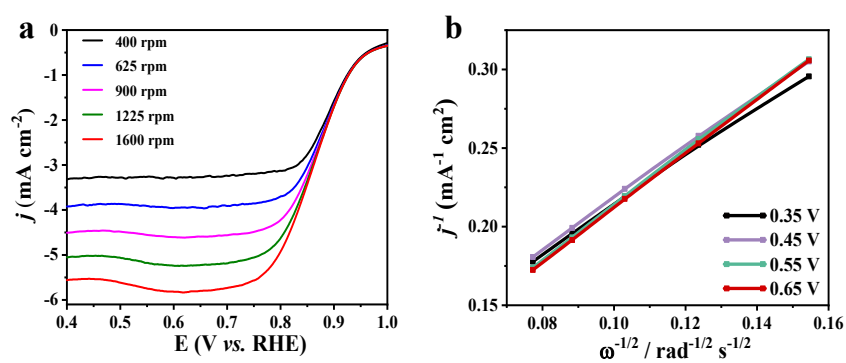

**Figure S5.** (a) LSV curves of  $\text{Fe}_3\text{C@MHNFs}$  at different rotating speeds, (b) the corresponding K-L plots.

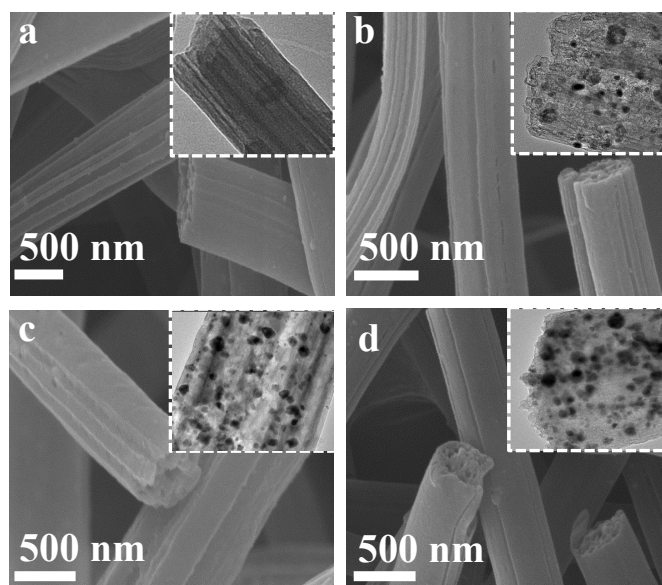

**Figure S6.** SEM and TEM for (a) MHNFs, (b)  $\text{Fe}_3\text{C-1@MHNFs}$ , (c)  $\text{Fe}_3\text{C@MHNFs}$ , (d)  $\text{Fe}_3\text{C-3@MHNFs}$ .

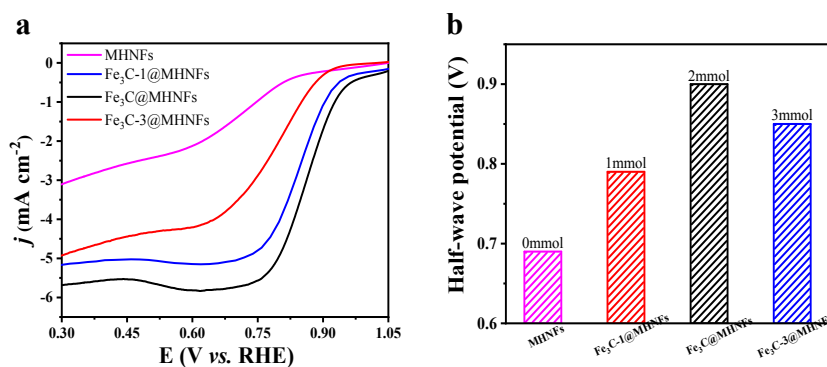

**Figure S7.** (a) Polarization curves and (b)  $E_{1/2}$  of the MHNFs, Fe<sub>3</sub>C-1@MHNFs, Fe<sub>3</sub>C@MHNFs and Fe<sub>3</sub>C-3@MHNFs.

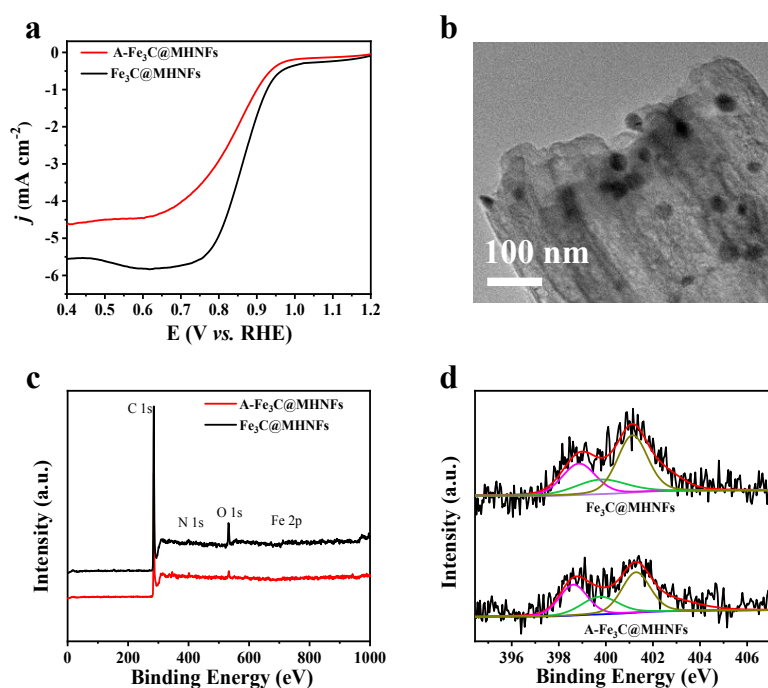

**Figure S8.** (a) Polarization curves of Fe<sub>3</sub>C@MHNFs and A-Fe<sub>3</sub>C@MHNFs; (b) TEM image of A-Fe<sub>3</sub>C@MHNFs; (c) XPS survey, (d) N 1s XPS spectra of Fe<sub>3</sub>C@MHNFs and A-Fe<sub>3</sub>C@MHNFs.

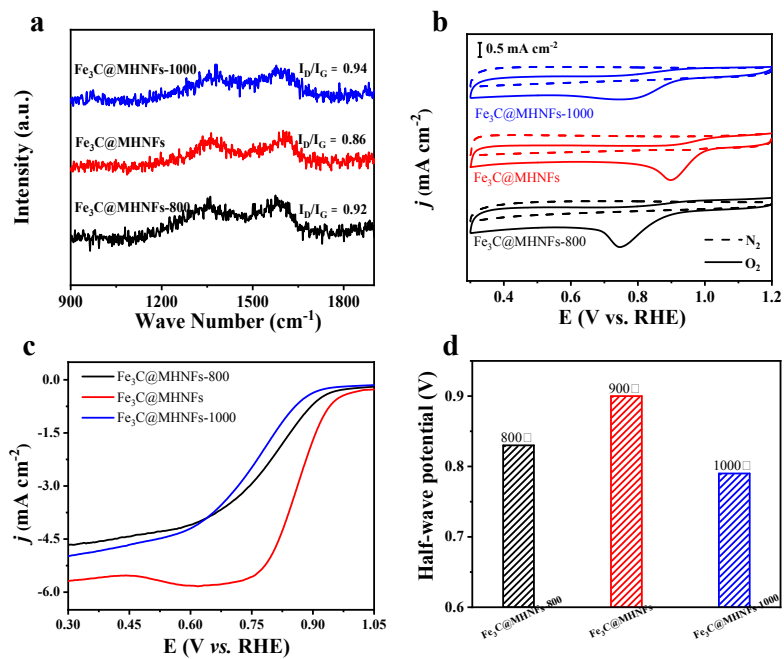

**Figure S9.** (a) Raman; (b) CV curves; (c) Polarization curves; (d)  $E_{1/2}$  of Fe<sub>3</sub>C@MHNFs-800, Fe<sub>3</sub>C@MHNFs and Fe<sub>3</sub>C@MHNFs-1000.

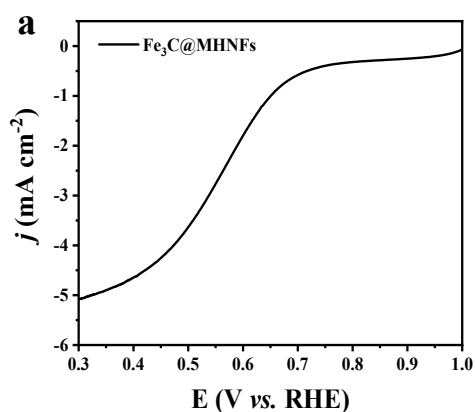

**Figure S10.** (a) LSV curves of Fe<sub>3</sub>C@MHNFs in 0.5 M H<sub>2</sub>SO<sub>4</sub>.

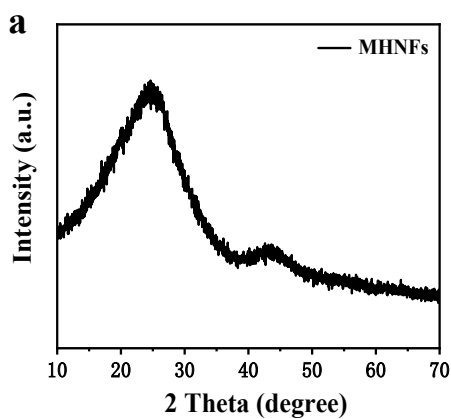

**Figure S11.** (a) XRD of the MHNFs.

**Table S1.** Comparison of the ORR activities of Fe<sub>3</sub>C@MHNFs with the noble-metal-free catalysts literature-reported.

| Catalyst                | Electrolyte | E <sub>1/2</sub><br>(V vs. RHE) | Catalyst loading<br>(mg cm <sup>-2</sup> ) | References |
|-------------------------|-------------|---------------------------------|--------------------------------------------|------------|
| Fe <sub>3</sub> C@MHNFs | 0.1 M KOH   | 0.90                            | 0.20                                       | This work  |
| Fe-N/C-800              | 0.1 M KOH   | 0.80                            | 0.10                                       | 1          |
| BCNFNHs                 | 0.1 M KOH   | 0.86                            | 1.20                                       | 2          |
| Fe@C-FeNC               | 0.1 M KOH   | 0.89                            | 0.70                                       | 3          |
| C-FeZIF-900-0.84        | 0.1 M KOH   | 0.84                            | 0.50                                       | 4          |
| HP-Fe-N/CNFs            | 0.1 M KOH   | 0.81                            | 0.25                                       | 5          |
| Fe-NMP                  | 0.1 M KOH   | 0.65                            | 0.25                                       | 6          |
| Fe/N/S-CNTs             | 0.1 M KOH   | 0.88                            | 0.50                                       | 7          |
| Fe14NDC-9               | 0.1 M KOH   | 0.88                            | 0.25                                       | 8          |

**Table S2.** XPS of Fe<sub>3</sub>C@MHNFs synthesized with ammoniation and A-Fe<sub>3</sub>C@MHNFs synthesized without ammoniation.

| Samples                   | C (at%) | N (at%) | O (at%) | Fe (at%) | pyridinic N<br>(%) | pyrrolic N<br>(%) | graphitic N<br>(%) |
|---------------------------|---------|---------|---------|----------|--------------------|-------------------|--------------------|
| Fe <sub>3</sub> C@MHNFs   | 92.71   | 2.60    | 4.24    | 0.45     | 0.30               | 0.21              | 0.49               |
| A-Fe <sub>3</sub> C@MHNFs | 93.08   | 1.21    | 5.30    | 0.41     | 0.23               | 0.29              | 0.48               |



## Reference

1. L. Lin, Z. Qing and A.-W. Xu, *J. Am. Chem. Soc.*, 2015, **249**, 11027-11033.
2. W. Yang, X. Liu, X. Yue, J. Jia and S. Guo, *J. Am. Chem. Soc.*, 2015, **137**, 1436-1439.
3. W.-J. Jiang, L. Gu, L. Li, Y. Zhang, X. Zhang, L.-J. Zhang, J.-Q. Wang, J.-S. Hu, Z. Wei and L.-J. Wan, *J. Am. Chem. Soc.*, 2016, **138**, 3570-3578.
4. Y. Deng, Y. Dong, G. Wang, K. Sun, X. Shi, L. Zheng, X. Li and S. Liao, *ACS Appl. Mater. Interfaces*, 2017, **9**, 9699-9709.
5. Y. Zhao, Q. Lai, Y. Wang, J. Zhu and Y. Liang, *ACS Appl. Mater. Interfaces*, 2017, **9**, 16178-16186.
6. M. M. Hbssen, K. Artyushkova, P. Atanassov and A. Serov, *J. Power Sources*, 2018, **375**, 214-221.
7. H. Jin, H. Zhou, W. Li, Z. Wang, J. Yang, Y. Xiong, D. He, L. Chen and S. Mu, *J. Mater. Chem. A*, 2018, **6**, 20093-20099.
8. M. Hoque, S. Zhang, M. L. Thomas, Z. Li, S. Suzuki, A. Ando, M. Yanagi, Y. Kobayashi, K. Dokko and M. Watanabe, *J. Mater. Chem. A*, 2018, **6**, 1138-1149.
